# Supplementary material for: A Pre-Vaccination Baseline of SARS-CoV-2 Genetic Surveillance and Diversity in the United States
Source: MDPI journal article supplement (doi:10.3390/v14010104), 2022-01-07
Supplement: s1 [file s1]

## Supplementary Material

# A pre-vaccination baseline of SARS-CoV-2 genetic surveillance and diversity in the United States

Adam A. Capoferri <sup>1,2,\*</sup>, Wei Shao <sup>3</sup>, Jon Spindler<sup>1</sup>, John M. Coffin <sup>4</sup>, Jason W. Rausch <sup>1</sup>, and Mary F. Kearney <sup>1</sup>

<sup>1</sup> HIV Dynamics and Replication Program, Center for Cancer Research, NCI-Frederick, Frederick, MD 21702, USA; [adam.capoferri@nih.gov](mailto:adam.capoferri@nih.gov) (A.A.C.); [jspindler@mail.nih.gov](mailto:jspindler@mail.nih.gov) (J.S.); [rauschj@mail.nih.gov](mailto:rauschj@mail.nih.gov) (J.W.R.); [kearney@mail.nih.gov](mailto:kearney@mail.nih.gov) (M.F.K.)

<sup>2</sup> Department of Microbiology and Immunology, Georgetown University, Washington DC 20007, USA; [ajl160@georgetown.edu](mailto:ajl160@georgetown.edu)

<sup>3</sup> Advanced Biomedical Computing Science, Frederick National Laboratory for Cancer Research, Frederick, MD 21702, USA; [shaow@mail.nih.gov](mailto:shaow@mail.nih.gov)

<sup>4</sup> Department of Molecular Biology and Microbiology, Tufts University, Boston, MA 02129, USA; [john.coffin@tufts.edu](mailto:john.coffin@tufts.edu)

\* Correspondence: [adam.capoferri@nih.gov](mailto:adam.capoferri@nih.gov)

### This file includes:

Supplemental Figures. S1 to S7

Supplemental Tables S1 to S5

References 71-75

## Supplemental Figures and Tables

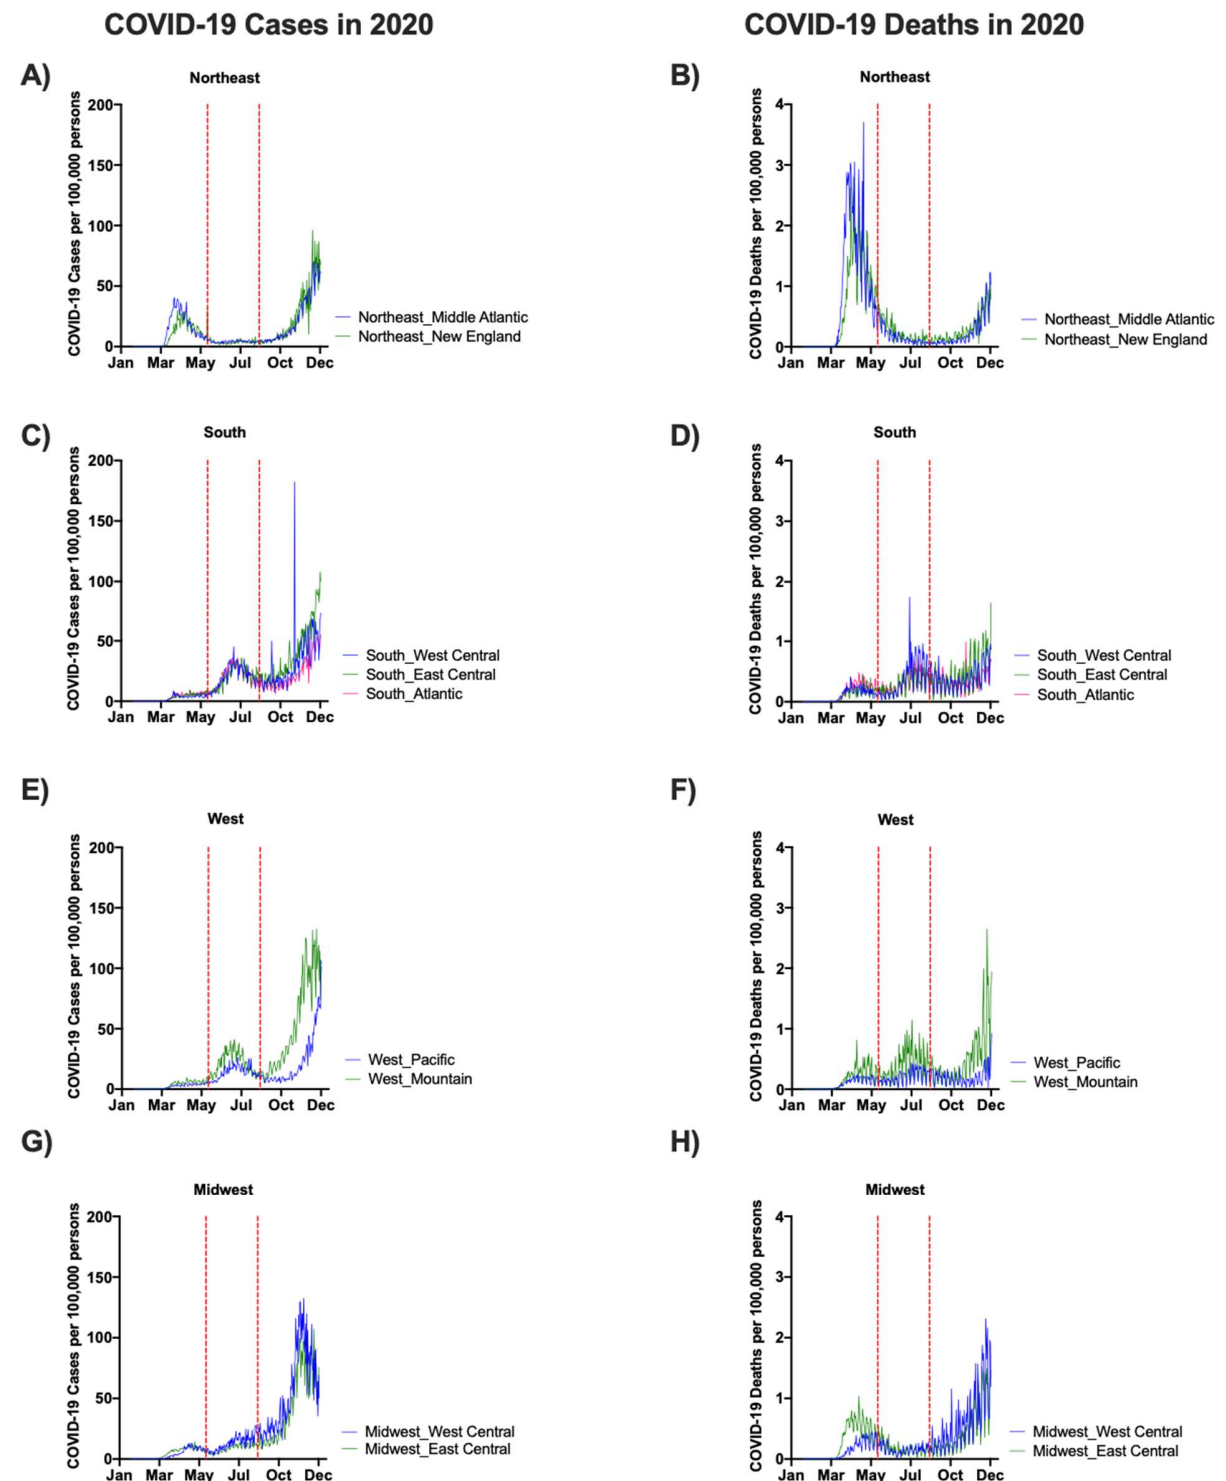

Supplemental Figure S1

SARS-CoV-2 epidemic at the divisional level in the U.S. (A, C, E, G) Number of daily COVID-19 Cases in 2020 per 100,000 persons normalized to the 2019 estimated population in each sub-region. (B, D, F, H)

Number of daily COVID-19 Deaths in 2020 per 100,000 persons normalized to the 2019 estimated population in each sub-region. **(A-B)** Northeast divisions of Middle Atlantic and New England. **(C-D)** Southern divisions of West Central, East Central, and Atlantic. **(E-F)** Western divisions of the Pacific and Mountain. **(G-H)** Midwestern divisions of West Central and East Central. Each division is colored respectively with dotted red lines indicating the separation of Phases. Population and date of first COVID-19 case in each sub-region is report in **Supplemental Table S1**.

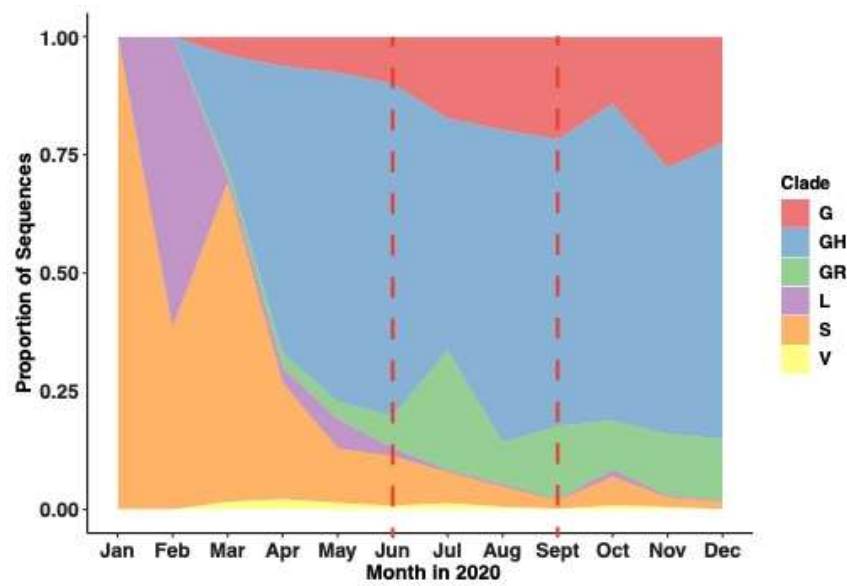

**Supplemental Figure S2**

**Proportion of SARS-CoV-2 genomes in each GISAID clade.** The proportion of sequences observed during each month in 2020 based on the GISAID assigned Clades was calculated. The dotted red lines indicate the separation of Phases 1, 2, and 3. Data were accessed 18-December-2020 whereby any sequences submitted or collected by 15-December-2020 were considered. Clades G, GH, and GR represented the majority of all sequences by Phase 3.

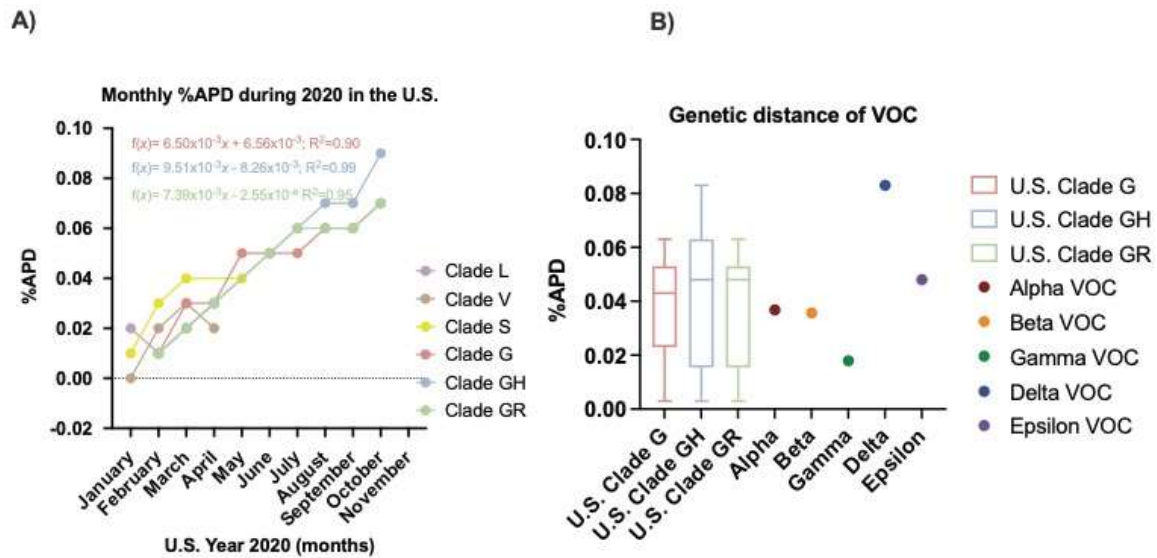

### Supplemental Figure S3

**Genetic distance over time in 2020 for GISAID clades and Variants of Concern.** (A) Average pair-wise distance (APD) was calculated per month for sequences within each clade. Time points with less than 10 sequences were excluded. Three randomized subsamples of 50 sequences each were analyzed and the APD was calculated to ensure consistency between each subsampling. If there were 11-50 sequences for a clade at a given month, no subsampling was performed. A standard linear regression was run for clades G, GH, and GR. The rate of change in %APD over time is noted in the figure with the goodness-of-fit ( $R^2$ ) reported. The %APD was plotted according to each respective month. The rate of change was  $6.50 \times 10^{-3}$  APD/month (clade G),  $9.51 \times 10^{-3}$  APD/month (clade GH), and  $7.39 \times 10^{-3}$  APD/month (clade GR); which corresponded to 1.95 nt/month (clade G), 2.85 nt/month (clade GH), and 2.22 nt/month (clade GR) based on the SARS-CoV-2 genome of ~30,000 bp. (B) Comparison of the %APD between the VOCs and the G-based Clades. A box and whisker plot of the %APD of the G-based clades in the U.S. during 2020 is shown. The median (solid line) is marked within the interquartile range, with the whiskers as the minimum and maximum. The VOC sequences sampled in the U.S. were accessed through GISAID.org with the collection date between 1-November-2020 to 31-March-2021. For the Delta VOC, all U.S. high quality sequences deposited until 27-July-2021 were selected. Total APD was calculated for the VOCs with a randomized subsampling of 2,500 sequences for the Delta VOC.

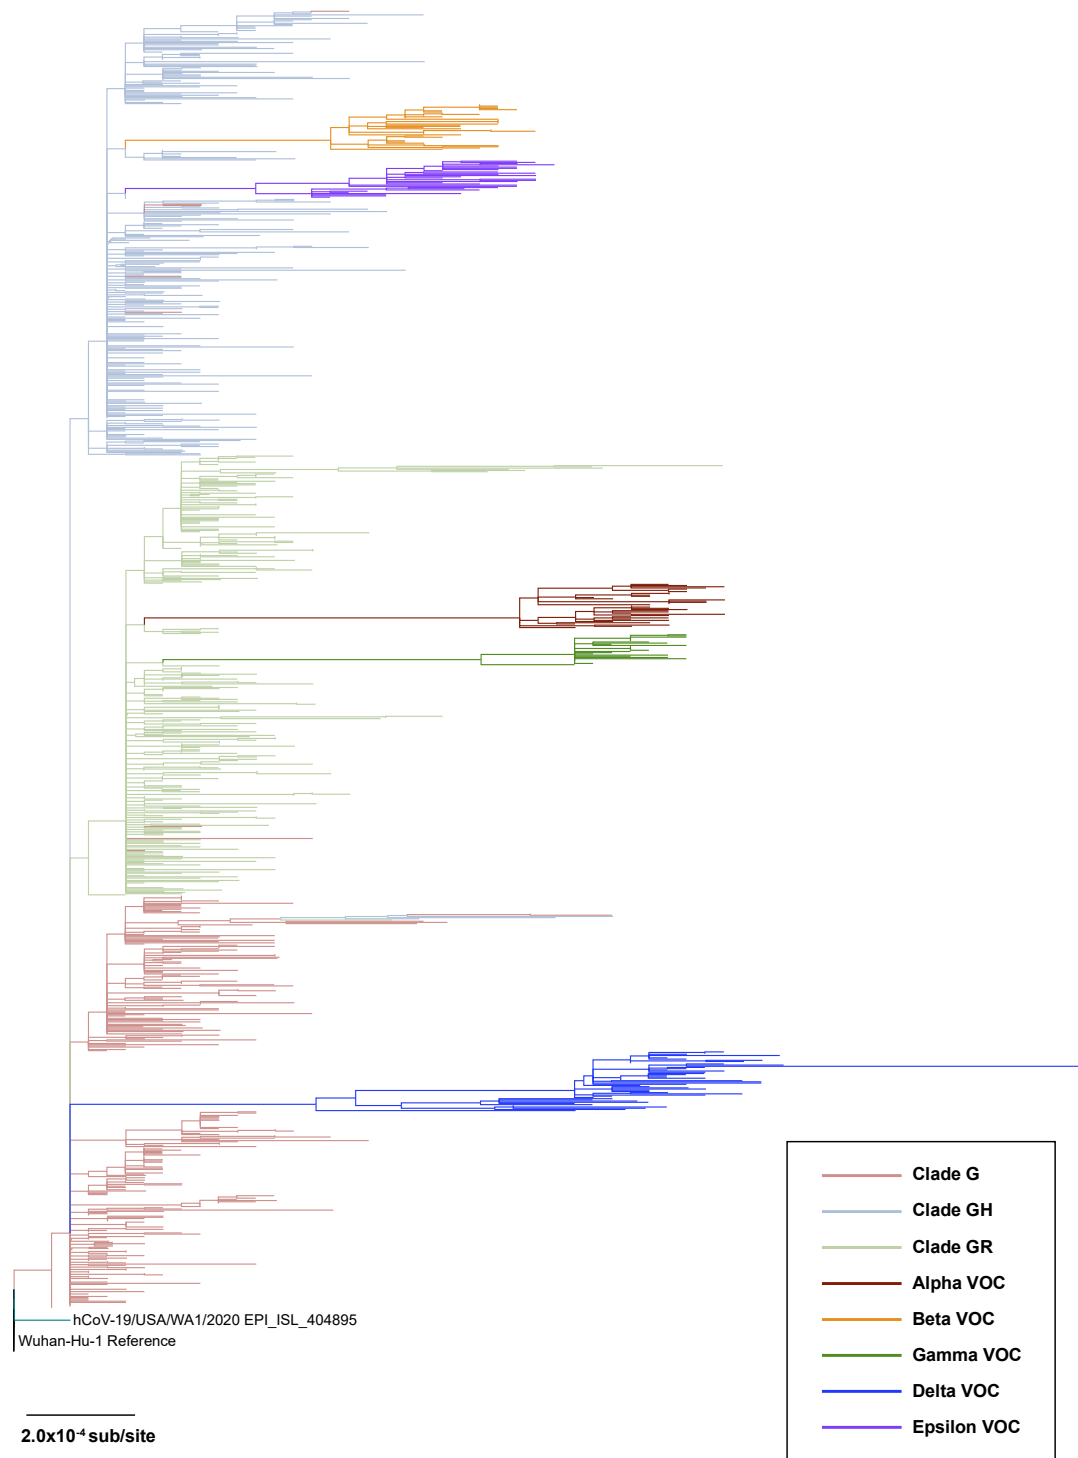

#### Supplemental Figure S4

**Phylogenetic analysis of SARS-CoV-2 in the U.S.** Maximum-likelihood phylogeny of U.S. and reference sequences. The phylogeny is rooted on the Wuhan-Hu-1 Reference genome and includes the first collected

U.S. SARS-CoV-2 genome (USA/WA1/2020 EPI\_ISL\_404895). Branches are colored according to either their associated GISAID Clade nomenclature or by VOC. The scale is set to  $2.0 \times 10^{-4}$  substitutions/site.

### Sensitivity for measuring the emergence of SARS-CoV-2 mutations

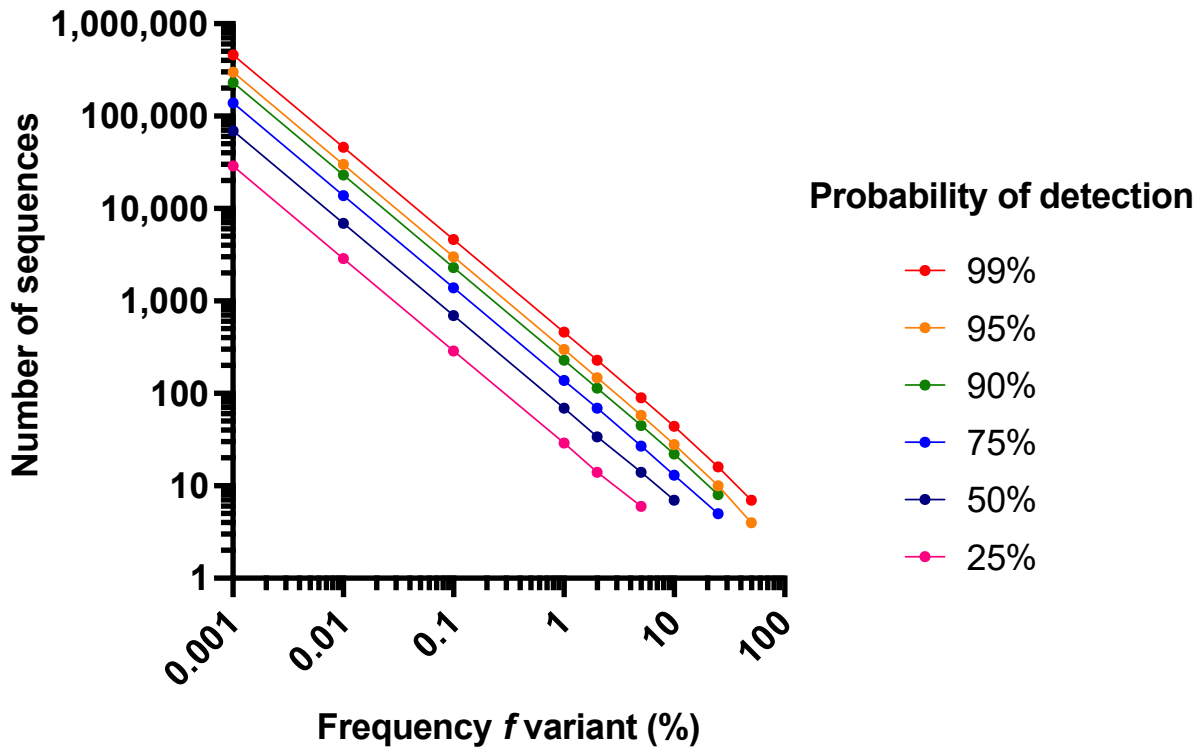

Supplemental Figure S5

**Determining number of sequences of sampling at a given probability to detect variant frequency.** To determine the number of sequences required to detect at a certain mutation frequency with a given probability, follows the quotient:  $N = \frac{\log(1-p)}{\log(1-f)}$ . Where ( $N$ ) is the number of sequences of any given sample that is required to be sampled to determine ( $f$ ), the frequency the mutant detected, at a given ( $p$ ), the probability of detecting the mutation at the provided frequency.



| Clade | Gene (amino acid position) | Phase | Epitope                               | U.S. Frequency | Description of epitope      |
|-------|----------------------------|-------|---------------------------------------|----------------|-----------------------------|
| G     | N (221-235)                | 1     | L L L L D R L N Q L E S K M S         | 1.58%          | T-cell MHC-II HLA-DR        |
|       |                            | 2     | . . . . . . . . . . . . . . . . F     | 11.29%         |                             |
|       |                            | 3     | . . . . . . . . . . . . . . . . F     | 22.01%         |                             |
|       |                            |       |                                       |                |                             |
| GH    | S (776-785)                | 1     | A L T G I A V E Q D K N T Q E F A Q V | 0%             | IgG/IgA and B-cell antibody |
|       |                            | 2     | . . . . . . . . . . . . . . . . Q     | 0.04%          |                             |
|       |                            | 3     | . . . . . . . . . . . . . . . . Q     | 15.98%         |                             |
|       |                            |       |                                       |                |                             |
| GR    | S (110-115)                | 1     | L D S K T Q                           | 0%             | B-cell antibody             |
|       |                            | 2     | . N . . . . .                         | 0.12%          |                             |
|       |                            | 3     | . N . . . . .                         | 8.75%          |                             |
|       |                            |       |                                       |                |                             |
|       | S (673-684)                | 1     | Y Q T Q T N S S P R R A R             | 0%             | B-cell antibody             |
|       |                            | 2     | . . . . . . . H . . . . .             | 0.12%          |                             |
|       |                            | 3     | . . . . . . . H . . . . .             | 7.50%          |                             |
|       |                            |       |                                       |                |                             |

### Supplemental Figure S6

**Mutations in G clades that are located in MHC-II HLA-DR T-cell and B-cell epitopes.** Nucleocapsid MHC-I/II T-cell and Spike B-cell epitopes with detected mutations are shown. Nonsynonymous mutations were detected in Clades GH and GR starting in Phase 2 through Phase 3 (highlighted). The amino acid position of the epitope is denoted next to N (Nucleocapsid) and S (Spike). The U.S. frequency of detection relative to the Clade is noted for each Phase. Epitopes examined are defined by **Supplemental Table S2**.

| Mutation | G  |    |    | GH |    |    | GR |    |    | Restriction if known | Epitope                                              |
|----------|----|----|----|----|----|----|----|----|----|----------------------|------------------------------------------------------|
|          | 1  | 2  | 3  | 1  | 2  | 3  | 1  | 2  | 3  |                      |                                                      |
| A35A     | <1 | <1 | <1 | >1 | <1 |    | <1 | <1 | <1 |                      |                                                      |
| P42P     | <1 |    |    |    |    |    | <1 | <1 |    |                      |                                                      |
| T43T     | >1 |    |    | >1 |    |    |    |    |    |                      |                                                      |
| P67S     | >1 |    |    | >1 | >1 | >1 |    |    |    |                      |                                                      |
| A152S    |    |    |    | <1 | >1 |    | >1 |    |    |                      |                                                      |
| S183Y    |    |    |    | >1 | >1 | >1 |    |    |    | B-cell               | SRGGSQASSSRSSSRSRNSSRNSTPGSSRGTS                     |
| S190I    | >1 |    |    | >1 | >1 |    | >1 | >1 | >1 | B-cell               | SRGGSQASSRSSSRSRNSSRNSTPGSSRGTS                      |
| S194L    | <1 | >1 |    | >1 | >1 | >1 |    |    |    | B-cell               | SRGGSQASSRSSSRSRNSSRNSTPGSSRGTS                      |
| P199L    |    | >1 |    | >1 | >1 | >1 | >1 |    |    | B-cell               | SRGGSQASSRSSSRSRNSSRNSTPGSSRGTS                      |
| S235F    | >1 | >1 |    | >1 | >1 | >1 |    |    |    | MHC-II               | LLLLDRLNQLESKM <u>S</u>                              |
| K261K    |    |    |    | <1 |    |    | <1 | <1 |    | B-cell<br>MHC-I      | KSAAEASKKPRQ <u>K</u> R<br><u>K</u> RATKAYNVTQAFGRGP |
| D377Y    | >1 | >1 |    | >1 | >1 | >1 | >1 | >1 |    | MHC-II               | FPPTPKKDKKKKA <u>D</u> ET                            |
| P383F    | >1 | <1 |    | <1 | <1 | <1 | <1 | <1 |    |                      |                                                      |

**Supplemental Figure S7. Selection pressure and epitopes detected in Nucleocapsid.** Mutations detected  $\geq 5\%$  in Nucleocapsid are reported with non-synonymous changes in red. Selection pressure measured by dN/dS across positions in Nucleocapsid for each clade and phase are noted. B-cell antibody and MHC-I/II T-cell epitopes were examined. MHC-II (HLA-DR) allotypes included: DRB\*01:01, DRB\*03:01, DRB\*04:01, DRB\*07:01, DRB\*11:01, and DRB\*15:01. Amino acid residues within epitopes that are bold and underlined indicate where the mutation is located within the mapped epitope region.

### Supplemental Table S1

**Demographics and Regional Division based on the U.S. Census Bureau.** The 2019 estimated residential population for each State is reported. The first reported confirmed plus probable cases of COVID-19 are included (<https://covidtracking.com/>). The U.S. is generally divided into the Northeast, South, West, and Midwest. Where each major region can be divided into sub-regions. These estimated populations were then used to normalize the incidence of COVID-19 cases and deaths in the U.S. at the sub-regional level.

| U.S. Region               | U.S. Sub-region                 | State | Estimated Resident Population (2019) | Date of first reporting cases of COVID-19 |
|---------------------------|---------------------------------|-------|--------------------------------------|-------------------------------------------|
| Northeast<br>(55,982,803) | Middle Atlantic<br>(41,137,740) | NJ    | 8,882,190                            | 05-March-2020                             |
|                           |                                 | NY    | 19,453,561                           | 03-March-2020                             |
|                           |                                 | PA    | 12,801,989                           | 06-March-2020                             |
|                           | New England<br>(14,845,063)     | CT    | 3,565,287                            | 08-March-2020                             |
|                           |                                 | ME    | 1,344,212                            | 12-March-2020                             |
|                           |                                 | MA    | 6,892,503                            | 04-March-2020                             |
|                           |                                 | NH    | 1,359,711                            | 04-March-2020                             |
|                           |                                 | RI    | 1,059,361                            | 01-March-2020                             |
|                           |                                 | VT    | 623,989                              | 08-March-2020                             |
| South<br>(125,580,448)    | West Central<br>(40,619,450)    | AR    | 3,017,804                            | 12-March-2020                             |
|                           |                                 | LA    | 4,648,794                            | 09-March-2020                             |
|                           |                                 | OK    | 3,956,971                            | 07-March-2020                             |
|                           |                                 | TX    | 28,995,881                           | 06-March-2020                             |
|                           | East Central<br>(19,176,181)    | AL    | 4,903,185                            | 13-March-2020                             |
|                           |                                 | KY    | 4,467,673                            | 07-March-2020                             |
|                           |                                 | MS    | 2,976,149                            | 12-March-2020                             |
|                           |                                 | TN    | 6,829,174                            | 05-March-2020                             |
|                           | Atlantic<br>(65,784,817)        | DE    | 973,764                              | 11-March-2020                             |
|                           |                                 | FL    | 21,477,737                           | 03-March-2020                             |
|                           |                                 | GA    | 10,617,423                           | 04-March-2020                             |
|                           |                                 | MD    | 6,045,680                            | 06-March-2020                             |
|                           |                                 | NC    | 10,488,084                           | 04-March-2020                             |
|                           |                                 | SC    | 5,148,714                            | 07-March-2020                             |
|                           |                                 | VA    | 8,535,519                            | 08-March-2020                             |
|                           |                                 | D.C.  | 705,749                              | 08-March-2020                             |
|                           |                                 | WV    | 1,792,147                            | 18-March-2020                             |
| West<br>(72,465,722)      | Pacific<br>(53,492,270)         | AK    | 731,545                              | 17-March-2020                             |
|                           |                                 | CA    | 39,512,223                           | 04-March-2020                             |
|                           |                                 | HI    | 1,415,872                            | 07-March-2020                             |
|                           |                                 | OR    | 4,217,737                            | 05-March-2020                             |
|                           |                                 | WA    | 7,614,893                            | 19-January-2020                           |
|                           | Mountain<br>(18,973,452)        | AZ    | 7,278,717                            | 04-March-2020                             |
|                           |                                 | CO    | 5,758,736                            | 04-March-2020                             |
|                           |                                 | ID    | 1,787,065                            | 14-March-2020                             |
|                           |                                 | MT    | 1,068,778                            | 12-March-2020                             |
|                           |                                 | NV    | 3,080,156                            | 05-March-2020                             |
|                           |                                 | NM    | 2,096,829                            | 12-March-2020                             |
|                           |                                 | UT    | 3,205,958                            | 07-March-2020                             |
|                           |                                 | WY    | 578,759                              | 12-March-2020                             |
| Midwest<br>(66,682,283)   | West Central<br>(19,779,852)    | IA    | 3,155,070                            | 09-March-2020                             |
|                           |                                 | KS    | 2,913,314                            | 08-March-2020                             |
|                           |                                 | MN    | 5,639,632                            | 06-March-2020                             |
|                           |                                 | MO    | 6,137,428                            | 08-March-2020                             |
|                           |                                 | NE    | 1,934,408                            | 07-March-2020                             |
|                           |                                 | ND    | 762,062                              | 12-March-2020                             |
|                           | East Central<br>(46,902,431)    | SD    | 884,659                              | 11-March-2020                             |
|                           |                                 | IL    | 12,671,821                           | 04-March-2020                             |
|                           |                                 | IN    | 6,732,219                            | 06-March-2020                             |
|                           |                                 | MI    | 9,986,857                            | 01-March-2020                             |
|                           |                                 | OH    | 11,689,100                           | 09-March-2020                             |
|                           |                                 | WI    | 5,822,434                            | 04-March-2020                             |

**Supplemental Table S2**

**SARS-CoV-2 T-cell and B-cell epitopes** in Spike and Nucleocapsid. Epitopes demonstrating cross-reactivity other human coronaviruses are denoted (\*). In some studies, specific HLA alleles were examined for MHC-I/II. MHC-II HLA-DR allotypes included: DRB\*01:01, DRB\*03:01, DRB\*04:01, DRB\*07:01, DRB\*11:01, and DRB\*15:01 (\*)

| Epitope                                      | Location     | Restriction                   | Reference |
|----------------------------------------------|--------------|-------------------------------|-----------|
| MKDLSRWYFYLLGTGPEAG                          | Nucleocapsid | MHC-II                        | [71, 72]  |
| SKLWAQCVQLHNDIL                              | Nsp7         | MHC-II                        |           |
| HNDILLAKDTTEAFE                              | Nsp7         | MHC-I                         |           |
| MEVTPSGTWL                                   | Nucleocapsid | MHC-I (HLA-B*40)              | [72]      |
| LTDEMAIQY                                    | Spike        | MHC-I (HLA-A*01)              |           |
| KTFPPTPEPKK                                  | Nucleocapsid | MHC-I (HLA-A*03)              |           |
| ATEGALNTPK                                   | Nucleocapsid | MHC-I (HLA-A*03)              |           |
| QYIKWPWYI                                    | Spike        | MHC-I (HLA-A*24)              |           |
| KDGIIWVATEGALNT                              | Nucleocapsid | MHC-II (HLA-DR <sup>#</sup> ) |           |
| GTWLTYTGAIKLDDK                              | Nucleocapsid | MHC-II (HLA-DR <sup>#</sup> ) |           |
| RWYFYLLGTGPEAGL                              | Nucleocapsid | MHC-II (HLA-DR <sup>#</sup> ) |           |
| ASWFTALTQHGKEDL                              | Nucleocapsid | MHC-II (HLA-DR <sup>#</sup> ) |           |
| ASAFFGMSRIGMEVT                              | Nucleocapsid | MHC-II (HLA-DR <sup>#</sup> ) |           |
| IGYYRRATRIRGGD                               | Nucleocapsid | MHC-II (HLA-DR <sup>#</sup> ) |           |
| LLLLDRLNQLESKMS                              | Nucleocapsid | MHC-II (HLA-DR <sup>#</sup> ) |           |
| ITRFQTLALHRSYL                               | Spike        | MHC-II (HLA-DR <sup>#</sup> ) |           |
| KYFKNHTSP                                    | Spike        | B-cell                        | [73]      |
| TTKR                                         | Spike        | B-cell                        |           |
| YYHKNNKSWM                                   | Spike        | B-cell                        |           |
| ASTEK                                        | Spike        | B-cell                        |           |
| AWNRRKR                                      | Spike        | B-cell                        |           |
| EQDKNTQ                                      | Spike        | B-cell                        |           |
| GTNTSN                                       | Spike        | B-cell                        |           |
| KYNENGT                                      | Spike        | B-cell                        |           |
| LDSKTQ                                       | Spike        | B-cell                        |           |
| PKKS                                         | Spike        | B-cell                        |           |
| YQTQTNSPRRAR                                 | Spike        | B-cell                        |           |
| VLTESNNKFLPFQQFGRDIA                         | Spike        | B-cell                        | [74]      |
| KPSKRSFIEDLLFNKVTLD                          | Spike        | B-cell                        |           |
| ELDSFKEELDKYFKNHTSPD                         | Spike        | B-cell                        |           |
| SDSTGSNQNGER                                 | Nucleocapsid | B-cell                        | [75]      |
| TNSSPDD                                      | Nucleocapsid | B-cell                        |           |
| SRGGSQASSRSSSRNSSRNSTPGSSRGTS                | Nucleocapsid | B-cell                        |           |
| SGKGQQQQG                                    | Nucleocapsid | B-cell                        |           |
| KSAAESKKPPQKRT                               | Nucleocapsid | B-cell                        |           |
| FPPTPEPKKDKKKKADET                           | Nucleocapsid | B-cell                        |           |
| GDGKMKDLSRWYFYLLGTGPEAGLPYGANKD<br>GIIWVATEG | Nucleocapsid | MHC-I                         |           |
| RMAGNGGDAALALLLDRLNQLES                      | Nucleocapsid | MHC-I                         |           |
| KRTATKAYNVTQAFGRGPG                          | Nucleocapsid | MHC-I                         |           |
| QFAPSASAFFGMSRIGMEVTPSGTWLTYTG               | Nucleocapsid | MHC-I                         |           |
| GGDGKMKDLSRWYFYLLGTGPEAGLPYGAN<br>K          | Nucleocapsid | MHC-II                        |           |
| NGGDAALALLLDRLNQLESKMSGKG                    | Nucleocapsid | MHC-II                        |           |
| RQGTDYKHWPQIAQFAPSASAFFGMSRI                 | Nucleocapsid | MHC-II                        |           |

**Supplemental Table S3.**

**Non-associated Clade G mutations that either persisted or emerged during 2020.** Data were extracted where, during at least one Phase period, the frequency of a particular mutation was  $\geq 5\%$  compared to the clade Phase 1 majority consensus. The mutation specifies the nucleotide change as well as the amino acid change with coordinates of the gene and its product. Non-synonymous mutations are shown in red.

| Gene  | Mutation       | Frequency (%) |         |         | Net Change (%)<br>Phase 1→3 |
|-------|----------------|---------------|---------|---------|-----------------------------|
|       |                | Phase 1       | Phase 2 | Phase 3 |                             |
| orf1a | a431c(D144A)   | 1.72          | 11.29   | 21.81   | +20.09                      |
|       | c792t(D264D)   | 0             | 7.59    | 0       | 0                           |
|       | g2017a(G673E)  | 0             | 16.83   | 1.54    | +1.54                       |
|       | g3253t(V1085F) | 5.1           | 0.07    | 0       | -5.10                       |
|       | g3606t(K1202N) | 3.21          | 11.29   | 21.81   | +18.60                      |
|       | t3666c(V1222V) | 1.54          | 11.04   | 21.62   | +20.08                      |
|       | c3961t(P1321S) | 0.40          | 8.68    | 11      | +10.60                      |
|       | c4919t(P1640L) | 6.02          | 0       | 0       | -6.02                       |
|       | c5407t(P1803S) | 0.53          | 8.82    | 10.62   | +10.09                      |
|       | c6020t(Y2007Y) | 0             | 1.24    | 11.20   | +11.20                      |
|       | a6176g(K2059R) | 0             | 0.49    | 5.02    | +5.02                       |
|       | a7572c(L2524F) | 0.40          | 8.57    | 10.23   | +9.83                       |
|       | c7875t(S2625S) | 0.09          | 0.49    | 5.02    | +4.93                       |
|       | t9477c(N3159N) | 0.13          | 17.29   | 1.54    | +1.41                       |
| orf1b | c69t(Y23Y)     | 5.01          | 0.21    | 0.39    | -4.62                       |
|       | c2550t(F850F)  | 0.31          | 9.03    | 1.35    | +1.04                       |
|       | c4172t(S1391L) | 0.40          | 18.38   | 1.54    | +1.14                       |
|       | c5019t(L1673L) | 0.04          | 8.54    | 15.83   | +15.79                      |
|       | c6057t(L2019L) | 0             | 1.2     | 10.81   | +10.81                      |
|       | g6210t(Q2070H) | 0             | 6.99    | 7.53    | +7.53                       |
|       | a6588g(E2196E) | 0             | 1.09    | 6.76    | +6.76                       |
|       | a6801g(L2267L) | 25.99         | 43.9    | 67.37   | +41.38                      |
|       | c6962t(P2321L) | 0             | 1.13    | 10.81   | +10.81                      |
|       | c7292t(A2431V) | 0             | 5.75    | 7.14    | +7.14                       |
| S     | t600c(Y200Y)   | 0             | 8.57    | 15.83   | +15.83                      |
|       | t2514c(G838G)  | 5.5           | 12.14   | 18.15   | +12.65                      |
|       | c3156a(F1052L) | 0.09          | 6.67    | 0       | -0.09                       |
| E     | c12t(F4F)      | 10.82         | 0.18    | 0       | -10.82                      |
| N     | c581t(S194L)   | 17.19         | 41.78   | 68.34   | +51.15                      |
|       | c704t(S235F)   | 1.58          | 11.29   | 22.01   | +20.43                      |
|       | c1148t(P383L)  | 0.13          | 6.81    | 0.19    | +0.06                       |

**Supplemental Table S4.**

**Non-associated Clade GH mutations that either persisted or emerged during 2020.** Data were extracted where, during at least one Phase period, the frequency of a particular mutation was  $\geq 5\%$  compared to the clade Phase 1 majority consensus. The mutation specifies the nucleotide change as well as the amino acid change with coordinates of the gene and its product. Non-synonymous mutations are shown in red.

| Gene  | Mutation        | Frequency (%) |         |         | Net Change (%) |
|-------|-----------------|---------------|---------|---------|----------------|
|       |                 | Phase 1       | Phase 2 | Phase 3 | Phase 1→3      |
| orf1a | c70t(R24C)      | 0.05          | 5.35    | 0.23    | +0.18          |
|       | t568c(F190L)    | 6.03          | 3.98    | 0.91    | -5.12          |
|       | t794c(I265T)    | 11.29         | 7.40    | 4.19    | -7.1           |
|       | g2748a(L916L)   | 0             | 0       | 5.18    | +5.18          |
|       | c3508t(R1170C)  | 0             | 0.65    | 16.36   | +16.36         |
|       | c4190t(A1397V)  | 0.03          | 0       | 5.18    | +5.15          |
|       | c6821t(T2274I)  | 0.02          | 0.44    | 16.21   | +16.19         |
|       | g7818a(M2606I)  | 0.03          | 2.16    | 27.09   | +27.06         |
|       | c10054t(L3352F) | 3.98          | 21.53   | 44.67   | +40.69         |
|       | a10058g(K3353R) | 0.19          | 6.10    | 8.60    | +8.41          |
|       | c11651t(S3884L) | 4.73          | 8.26    | 5.18    | +0.45          |
|       | g11978a(R3993H) | 0             | 0.02    | 5.10    | +5.1           |
| orf1b | t724c(L242L)    | 0.01          | 0.67    | 15.60   | +15.59         |
|       | c1338t(Y446Y)   | 0.05          | 2.19    | 27.55   | +27.5          |
|       | t1809a(P603P)   | 0.01          | 6.37    | 5.25    | +5.24          |
|       | t2100c(S700S)   | 0             | 0       | 5.18    | +5.18          |
|       | c2187t(D729D)   | 0.07          | 0.62    | 9.59    | +9.52          |
|       | g2205t(E735D)   | 0.01          | 0.05    | 5.94    | +5.93          |
|       | c2625t(Y875Y)   | 0.03          | 0.11    | 16.06   | +16.03         |
|       | c2793t(C931C)   | 1.04          | 9.56    | 20.47   | +19.43         |
|       | t2958g(L986L)   | 0.01          | 5.27    | 0.23    | +0.22          |
|       | t3734c(L1245S)  | 0             | 0.02    | 5.02    | +5.02          |
|       | g4254t(V1418V)  | 0.03          | 0.40    | 5.94    | +5.91          |
|       | c4954t(P1652S)  | 0             | 0       | 5.02    | +5.02          |
|       | a4957g(N1653D)  | 0.04          | 10.57   | 42.09   | +42.05         |
|       | c5410t(L1804L)  | 6.78          | 4.38    | 0.99    | -5.79          |
|       | g5518t(V1840F)  | 0.01          | 0.37    | 5.78    | +5.77          |
|       | c7837t(R2613C)  | 0.06          | 10.02   | 40.64   | +40.58         |
| S     | c1623t(F541F)   | 0.01          | 0.13    | 6.01    | +6.00          |
|       | g2338c(E780Q)   | 0             | 0.41    | 15.98   | +15.98         |
|       | a2691t(P897P)   | 0             | 0.64    | 16.06   | +16.06         |
| N     | c162t(T54T)     | 0.01          | 0.06    | 5.18    | +5.17          |
|       | c199t(P67S)     | 0.03          | 10.46   | 39.88   | +39.85         |
|       | g454t(A152S)    | 0.01          | 0.08    | 6.32    | +6.31          |
|       | c548a(S183Y)    | 1.03          | 9.53    | 20.70   | +19.67         |
|       | g569t(S190I)    | 0.01          | 6.32    | 8.37    | +8.36          |
|       | c596t(P199L)    | 0.04          | 10.26   | 39.80   | +39.76         |
|       | g1129t(D377Y)   | 0.14          | 0.60    | 13.17   | +13.03         |

**Supplemental Table S5.**

**Non-associated Clade GR mutations that either persisted or emerged during 2020.** Data were extracted where, during at least one Phase period, the frequency of a particular mutation was  $\geq 5\%$  compared to the clade Phase 1 majority consensus. The mutation specifies the nucleotide change as well as the amino acid change with coordinates of the gene and its product. Non-synonymous mutations are shown in red.

| Gene  | Mutation        | Frequency (%) |         |         | Net Change (%)<br>Phase 1→3 |
|-------|-----------------|---------------|---------|---------|-----------------------------|
|       |                 | Phase 1       | Phase 2 | Phase 3 |                             |
| orf1a | c48t(L16L)      | 12.50         | 5.41    | 4.17    | -8.33                       |
|       | a566g(N189S)    | 0             | 0.04    | 9.17    | +9.17                       |
|       | c671t(T224I)    | 0.12          | 1.13    | 5.83    | +5.71                       |
|       | c1023t(C341C)   | 0             | 0.12    | 8.75    | +8.75                       |
|       | t1297c(C433R)   | 0             | 0.54    | 15.42   | +15.42                      |
|       | g1770t(L590F)   | 0             | 1.67    | 19.17   | +19.17                      |
|       | g2994t(Q998H)   | 0.30          | 1.05    | 5.42    | +5.12                       |
|       | a2997g(T999T)   | 0             | 0.08    | 11.67   | +11.67                      |
|       | t3480c(H1160H)  | 0             | 0.08    | 9.17    | +9.17                       |
|       | t8907c(L2969L)  | 2.25          | 1.59    | 7.92    | +5.67                       |
|       | a10683g(R3561R) | 2.25          | 1.59    | 7.92    | +5.67                       |
|       | c10712t(A3571V) | 0             | 0.12    | 7.50    | +7.50                       |
|       | c10785t(V3595V) | 0             | 0.23    | 8.75    | +8.75                       |
|       | c11409t(Y3803Y) | 0.12          | 0.27    | 15.42   | +15.30                      |
|       | c11691t(D3897D) | 0.06          | 1.94    | 18.75   | +18.69                      |
|       | c11760t(S3920S) | 3.40          | 3.31    | 17.92   | +14.52                      |
|       | c13161t(R4387R) | 0             | 0.23    | 9.58    | +9.58                       |
| orf1b | c1470t(D490D)   | 0             | 0.23    | 8.75    | +8.75                       |
|       | c2466t(Y822Y)   | 14.32         | 26.60   | 4.58    | -9.74                       |
|       | g3346a(V1116I)  | 6.13          | 2.92    | 0       | -6.13                       |
|       | g3501t(E1167D)  | 11.95         | 24.27   | 4.58    | -7.37                       |
|       | c5544t(D1848D)  | 0.91          | 5.02    | 0       | -0.91                       |
|       | t6372c(N2124N)  | 22.82         | 38.12   | 32.92   | +10.1                       |
|       | c7007t(T2336I)  | 2.06          | 5.10    | 0       | -2.06                       |
| S     | g79t(A27S)      | 0             | 0.35    | 5.42    | +5.42                       |
|       | c249t(V83V)     | 0             | 0       | 8.33    | +8.33                       |
|       | g331a(D111N)    | 0             | 0.12    | 8.75    | +8.75                       |
|       | c1221t(V407V)   | 0             | 0.12    | 8.75    | +8.75                       |
|       | c2042a(P681H)   | 0             | 0.12    | 7.50    | +7.50                       |
|       | c2145t(P715P)   | 3.46          | 3.62    | 20.00   | +16.54                      |
|       | a2194g(T732A)   | 0.18          | 0.74    | 7.92    | +7.74                       |
|       | a3312g(V1104V)  | 0             | 0.12    | 7.50    | +7.50                       |
| M     | c3342t(I1114I)  | 0.06          | 0.31    | 9.17    | +9.11                       |
|       | g208t(V70F)     | 2.31          | 1.63    | 7.92    | +5.61                       |
| N     | a405g(E135E)    | 0             | 0.12    | 7.08    | +7.08                       |
|       | g105t(A35A)     | 0.55          | 1.32    | 8.75    | +8.20                       |
|       | c126a(P42P)     | 0             | 0.04    | 5.42    | +5.42                       |
|       | a783g(K261K)    | 0             | 0.23    | 5.83    | +5.83                       |

## References

71. Le Bert, N.; Tan, A. T.; Kunasegaran, K.; Tham, C. Y. L.; Hafezi, M.; Chia, A.; Chng, M. H. Y.; Lin, M.; Tan, N.; Linster, M.; Chia, W. N.; Chen, M. I.; Wang, L. F.; Ooi, E. E.; Kalimuddin, S.; Tambyah, P. A.; Low, J. G.; Tan, Y. J.; Bertoletti, A., SARS-CoV-2-specific T cell immunity in cases of COVID-19 and SARS, and uninfected controls. *Nature* **2020**, 584, (7821), 457-462.
72. Nelde, A.; Bilich, T.; Heitmann, J. S.; Maringer, Y.; Salih, H. R.; Roerden, M.; Lübke, M.; Bauer, J.; Rieth, J.; Wacker, M.; Peter, A.; Hörber, S.; Traenkle, B.; Kaiser, P. D.; Rothbauer, U.; Becker, M.; Junker, D.; Krause, G.; Strengert, M.; Schneiderhan-Marra, N.; Templin, M. F.; Joos, T. O.; Kowalewski, D. J.; Stos-Zweifel, V.; Fehr, M.; Rabsteyn, A.; Mirakaj, V.; Karbach, J.; Jäger, E.; Graf, M.; Gruber, L. C.; Rachfalski, D.; Preuß, B.; Hagelstein, I.; Märklin, M.; Bakchoul, T.; Gouttefangeas, C.; Kohlbacher, O.; Klein, R.; Stevanović, S.; Rammensee, H. G.; Walz, J. S., SARS-CoV-2-derived peptides define heterologous and COVID-19-induced T cell recognition. *Nat Immunol* **2021**, 22, (1), 74-85.
73. Zheng, M.; Song, L., Novel antibody epitopes dominate the antigenicity of spike glycoprotein in SARS-CoV-2 compared to SARS-CoV. *Cellular & Molecular Immunology* **2020**, 17, (5), 536-538.
74. Shrock, E.; Fujimura, E.; Kula, T.; Timms, R. T.; Lee, I. H.; Leng, Y.; Robinson, M. L.; Sie, B. M.; Li, M. Z.; Chen, Y.; Logue, J.; Zuiani, A.; McCulloch, D.; Lelis, F. J. N.; Henson, S.; Monaco, D. R.; Travers, M.; Habibi, S.; Clarke, W. A.; Caturegli, P.; Laeyendecker, O.; Piechocka-Trocha, A.; Li, J. Z.; Khatri, A.; Chu, H. Y.; Villani, A. C.; Kays, K.; Goldberg, M. B.; Hacohen, N.; Filbin, M. R.; Yu, X. G.; Walker, B. D.; Wesemann, D. R.; Larman, H. B.; Lederer, J. A.; Elledge, S. J., Viral epitope profiling of COVID-19 patients reveals cross-reactivity and correlates of severity. *Science* **2020**, 370, (6520).
75. Oliveira, S. C.; de Magalhães, M. T. Q.; Homan, E. J., Immunoinformatic Analysis of SARS-CoV-2 Nucleocapsid Protein and Identification of COVID-19 Vaccine Targets. *Frontiers in Immunology* **2020**, 11, (2758).
